# Supplementary material for: Protocol for a hybrid effectiveness-implementation clinical trial evaluating video-assisted electronic consent vs standard consent for patients initiating and continuing haemodialysis in Australia (eConsent HD)
Source: PubMed Central journal article supplement — BMJ Open. 2024 Jul 11;14(7):e081181. doi: 10.1136/bmjopen-2023-081181 (PMC11243118; doi:10.1136/bmjopen-2023-081181), 2024-07-11
Supplement: bmjopen-14-7-s001.pdf [file bmjopen-14-7-s001.pdf]

## INTERVIEW GUIDE

### Opening

1. Welcome and put the participant at ease and introduction of the researcher (name and background)
2. Interview purpose and process
3. Review and confirm consent

### Topic Areas

1. Brief biography
  - Can you/they please tell me about your kidney disease/problem?
  - What do you believe might have caused your/their kidney disease?
  - How does your/their kidney disease currently impact your/their life?
  - Have you/they considered whether to have conservative kidney management (no dialysis) or have you decided to have dialysis?

#### *General prompts*

- *Tell me more about ... (as with interview questions/topics)?*
- *Can you give me some examples for this matter?*

2. How decisions were made about management and views on pathway
  - How were the treatment options for managing your/their kidney disease presented to you/them?
  - Who discussed these options with you/them?
  - What information were you/they provided with,
  - Who was involved in making the decision about whether or not to undergo dialysis?
  - What factors influenced your/their ultimate decision regarding kidney disease management?
  - Have you/they reconsidered your/their initial decision, or do you/they anticipate doing so in the future?

#### *General prompts*

- *Tell me more about ... (as with interview questions/topics)?*
- *Can you give me some examples for this matter?*

- 3a. For those who chose conservative kidney management
  - What motivated your/their decision to choose conservative kidney management?
  - What did you/they perceive as the potential benefits of conservative kidney management?

#### *General prompts*

- *Tell me more about ... (as with interview questions/topics)?*
- *Can you give me some examples for this matter?*

- 3b. For those who opted for dialysis but have not yet started
  - What influenced your/their decision to undergo dialysis in the future?
  - What do you/they anticipate as the benefits of dialysis?

#### *General prompts*

- *Tell me more about ... (as with interview questions/topics)?*

- *Can you give me some examples for this matter?*

3c. For those already undergoing dialysis:

- What factors led to your/their decision to start dialysis?
- What benefits did you/they anticipate from dialysis?
- Were there any other implications you/they considered?
- Have you/they encountered any unexpected experiences since starting dialysis?
- Can you describe any concerns you/they had during the decision-making process regarding your/their kidney disease management?
- How much time did it take for you to decide on starting dialysis?
- Were your family/significant others involved in the decision? If so how? If not why not?
- What concerns do you/they currently have about the decision that was made regarding your/their kidney disease management?
- How well did you/they understand the consequences and procedures at the time?
- Did you/they feel adequately involved in the decision-making process?
- Overall, how do you/they feel about the management of the decision-making process?
- How do you/they think the decision-making process could be improved or changed?

*General prompts*

- *Tell me more about ... (as with interview questions/topics)?*
- *Can you give me some examples for this matter?*

4. Using digital health technologies for education, decision-making and informed consent:

- Can you please tell me about experience of using the internet to learn about your health? Kidney problems?
  - o If so, what sites did you find helpful? What made these sites helpful?
  - o If no experience – ask why not.
- If you wanted to learn something about managing your kidney problem using a computer or laptop which we call digital interface, what would you consider important areas to be covered?
- You probably have experienced giving consent (permission) for a doctor (or another health professional) to do an operation or a procedure or to start dialysis. Thinking back to that experience, what helped you to decide whether to give consent?
- Now imagine the consent to start dialysis is electronic and the information is given to you that way, what would you/they consider is needed for you to give consent that way?
- What features would you/they find most helpful in a digital interface for kidney disease education and decision-making?

*General prompts*

- *Tell me more about ... (as with interview questions/topics)?*
- *Can you give me some examples for this matter?*

### **Closing**

I appreciate the time you took for this interview. Is there anything else you would like to add or would like to change any information that has been shared?

I should have all the information I need. Thank you again.
